# Supplementary material for: Increased precision of orthotopic and metastatic breast cancer surgery guided by matrix metalloproteinase-activatable near-infrared fluorescence probes
Source: PubMed Central journal article supplement (PMC4585795; doi:10.1038/srep14197), 2015-09-23
Supplement: srep14197-s1.pdf [file srep14197-s1.pdf]

## Supplementary Information

---

### Increased precision of orthotopic and metastatic breast cancer surgery guided by matrix metalloproteinase activatable near-infrared fluorescence probes

Chongwei Chi<sup>1</sup>, Qian Zhang<sup>2</sup>, Yamin Mao<sup>1</sup>, Deqiang Kou<sup>3</sup>, Jingdan Qiu<sup>3</sup>, Jinzuo Ye<sup>1</sup>, Jiandong Wang<sup>3</sup>, Zhongliang Wang<sup>\*2</sup>, Yang Du<sup>\*1</sup>, and Jie Tian<sup>\*1</sup>

<sup>1</sup>Key Laboratory of Molecular Imaging of Chinese Academy of Sciences, Institute of Automation, Chinese Academy of Sciences, Beijing 100190, China;

<sup>2</sup>School of Life Science and Technology, Xidian University, Xi'an 710071, China;

<sup>3</sup>Department of General Surgery, General Hospital of People's Liberation Army, Beijing 100853, China.

\*Corresponding authors:

Dr. Zhongliang Wang, Email: [wangzl@xidian.edu.cn](mailto:wangzl@xidian.edu.cn)

Dr. Yang Du, Email: [yang.du@ia.ac.cn](mailto:yang.du@ia.ac.cn)

Dr. Jie Tian, E-mail: [tian@ieee.org](mailto:tian@ieee.org); [jie.tian@ia.ac.cn](mailto:jie.tian@ia.ac.cn)

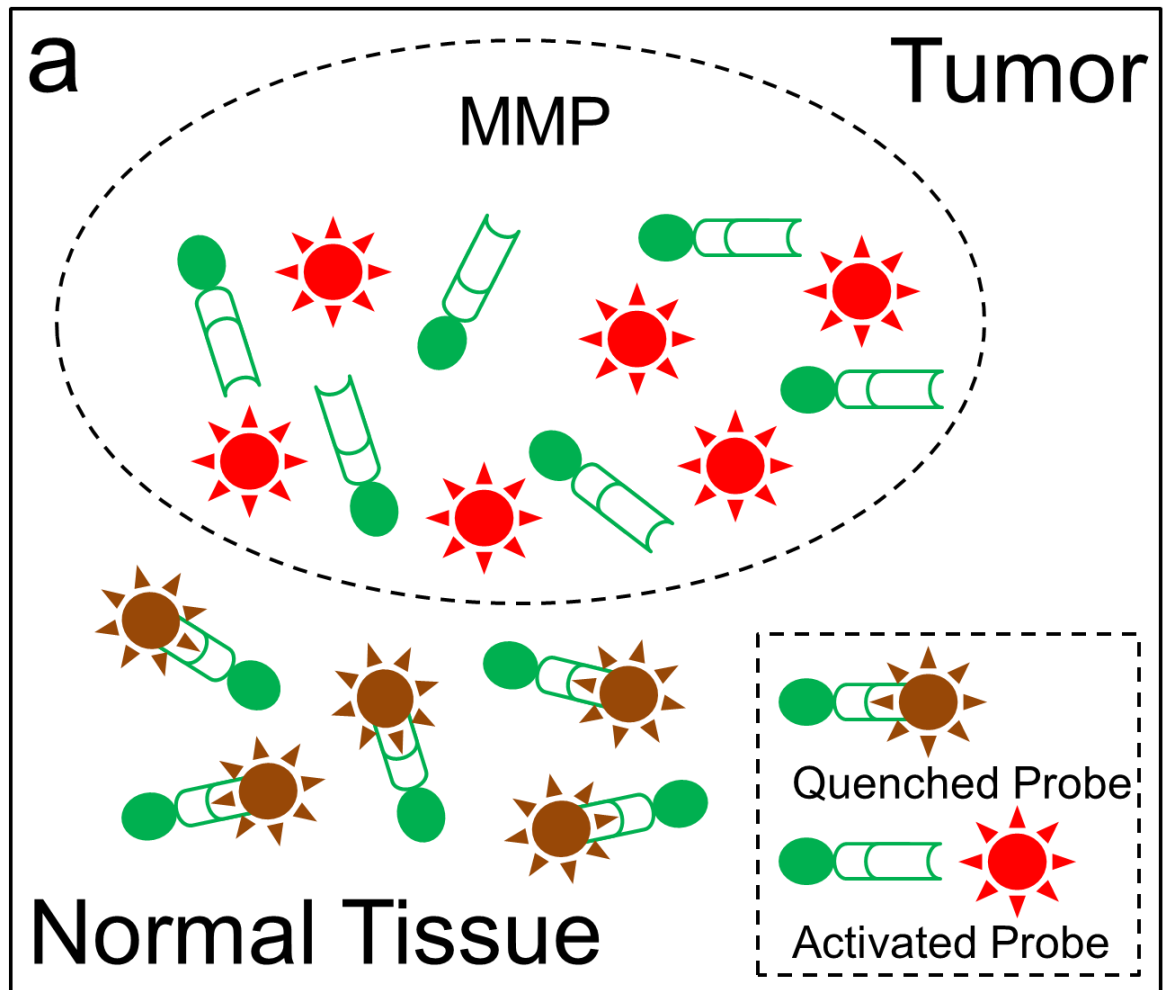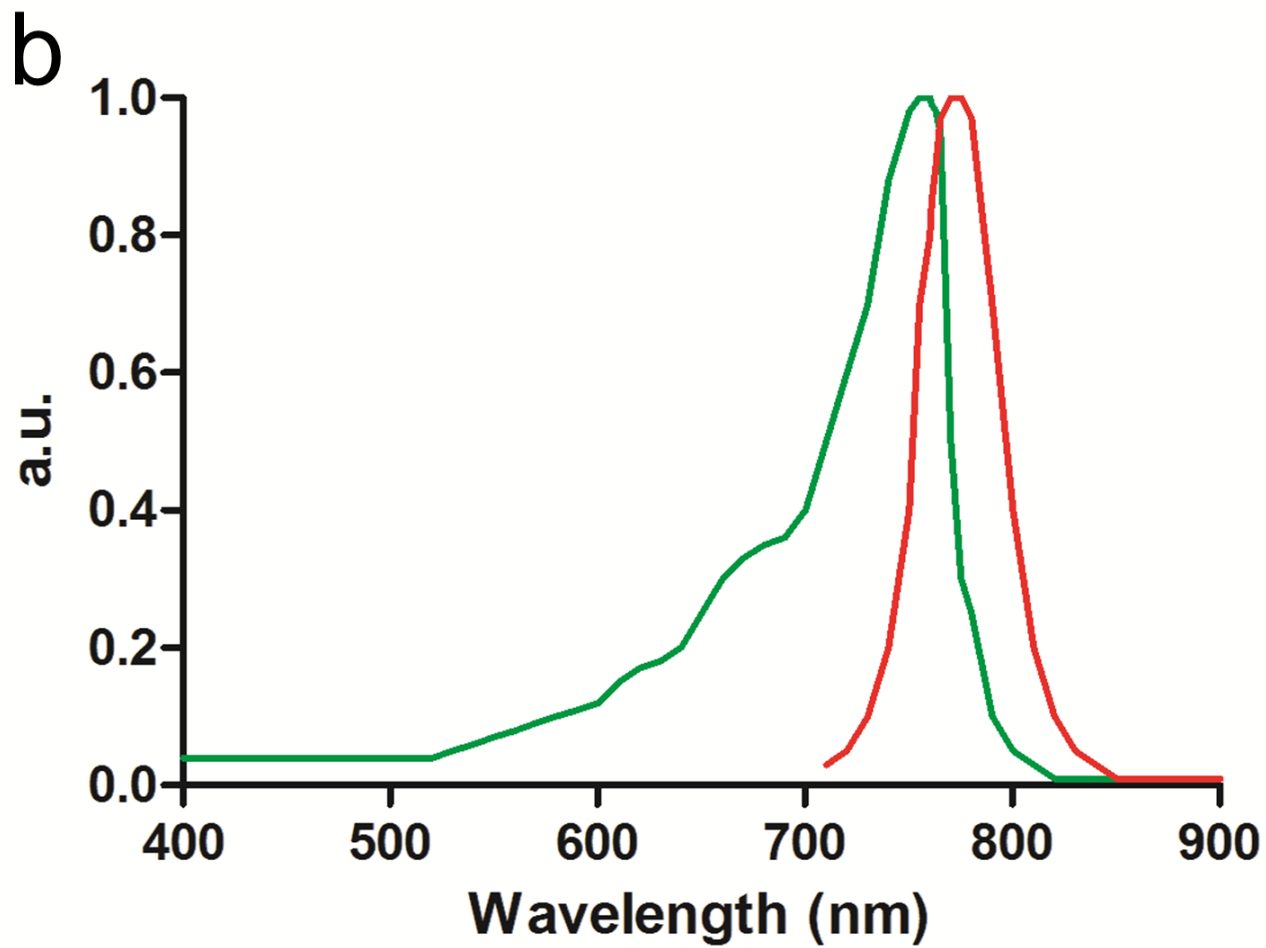

**Figure S1.** Schematic diagram of the probe targeting property. (a) The tumor area was shown in the dotted line. When the smart MMP-750 probe was injected into the normal tissues, the fluorescence was quenched as shown in brown color. When the smart probe reached to the MMP-overexpressing tumor area, the probe was activated by the cleavage of MMP enzyme and emitted NIR fluorescence. In this case, the excitation and emission spectra of activated MMP-750 probe were shown in the Figure S1b. ( $\lambda_{Ex} = 749$  nm,  $\lambda_{Em} = 775$  nm).

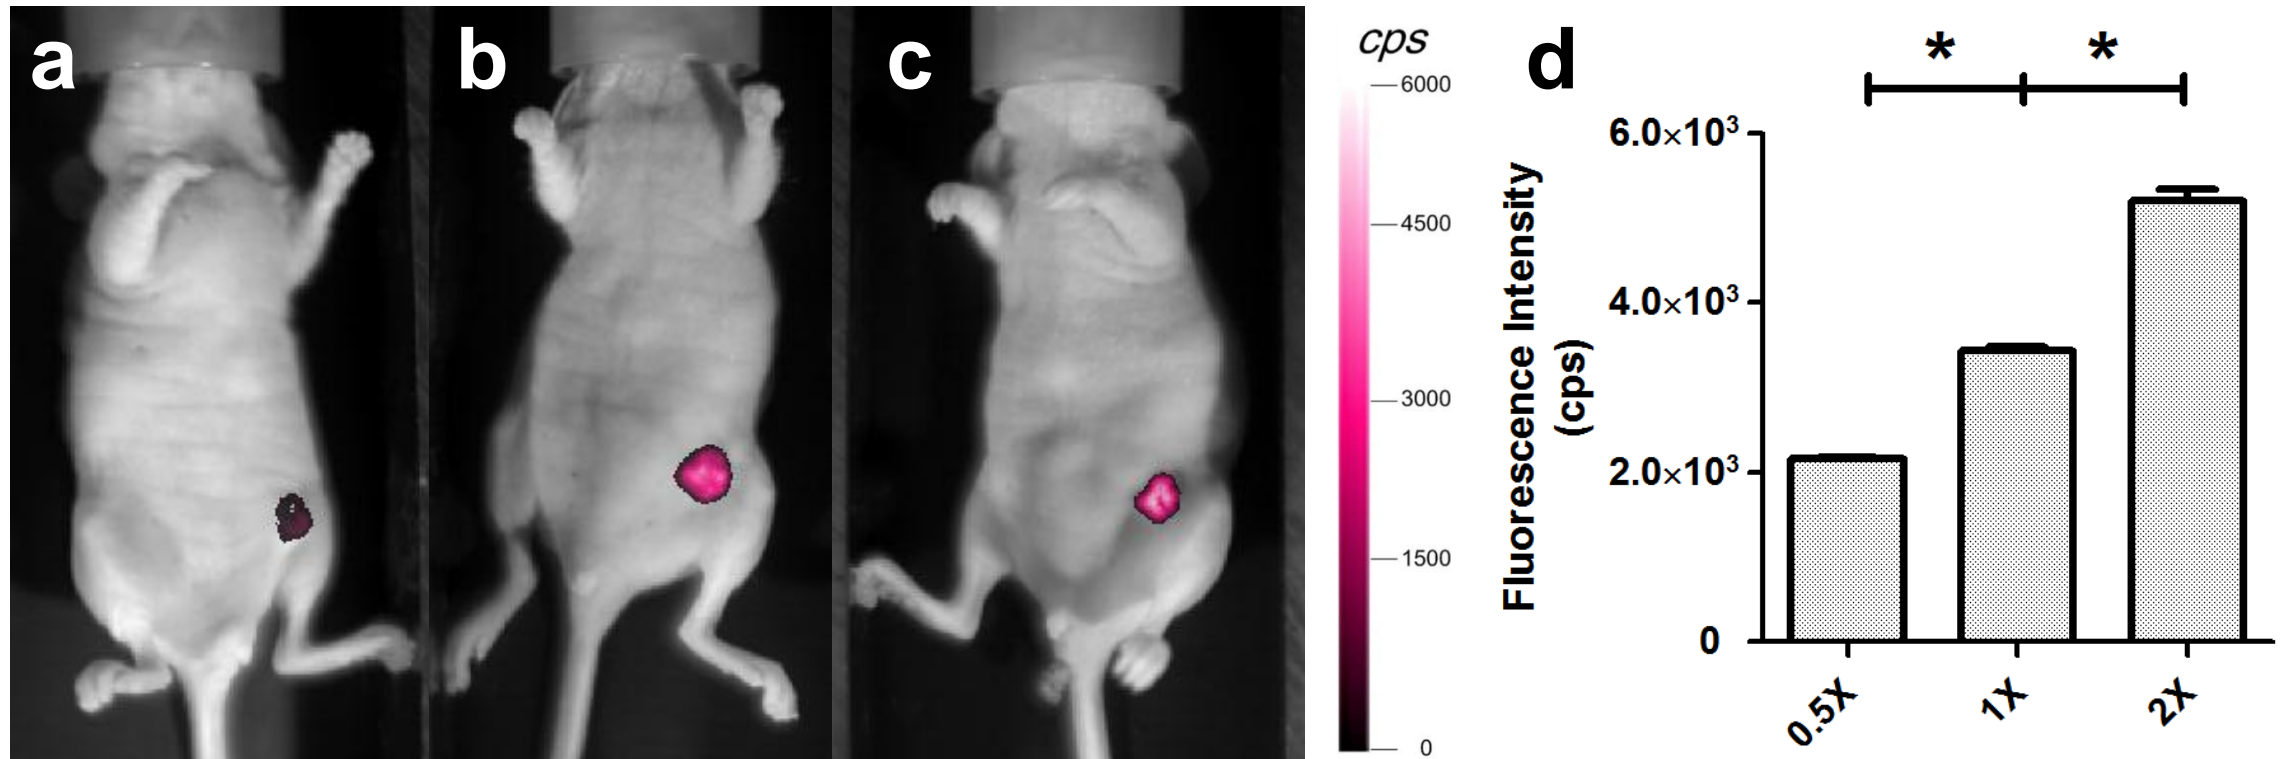

**Figure S2.** Fluorescence Molecular Imaging of MMP-750 probe 24 h after IV injection into the orthotopic breast tumor models. (a) half dosage (1 nmol, 100  $\mu$ L), (b) recommended dosage (2 nmol, 100  $\mu$ L), and (c) double dosage (4 nmol, 100  $\mu$ L). (d) The quantified analysis of the tumor area, which showed statistics significance ( $p < 0.05$ ) between different groups. Mean and standard deviation were derived from three independent experiments.

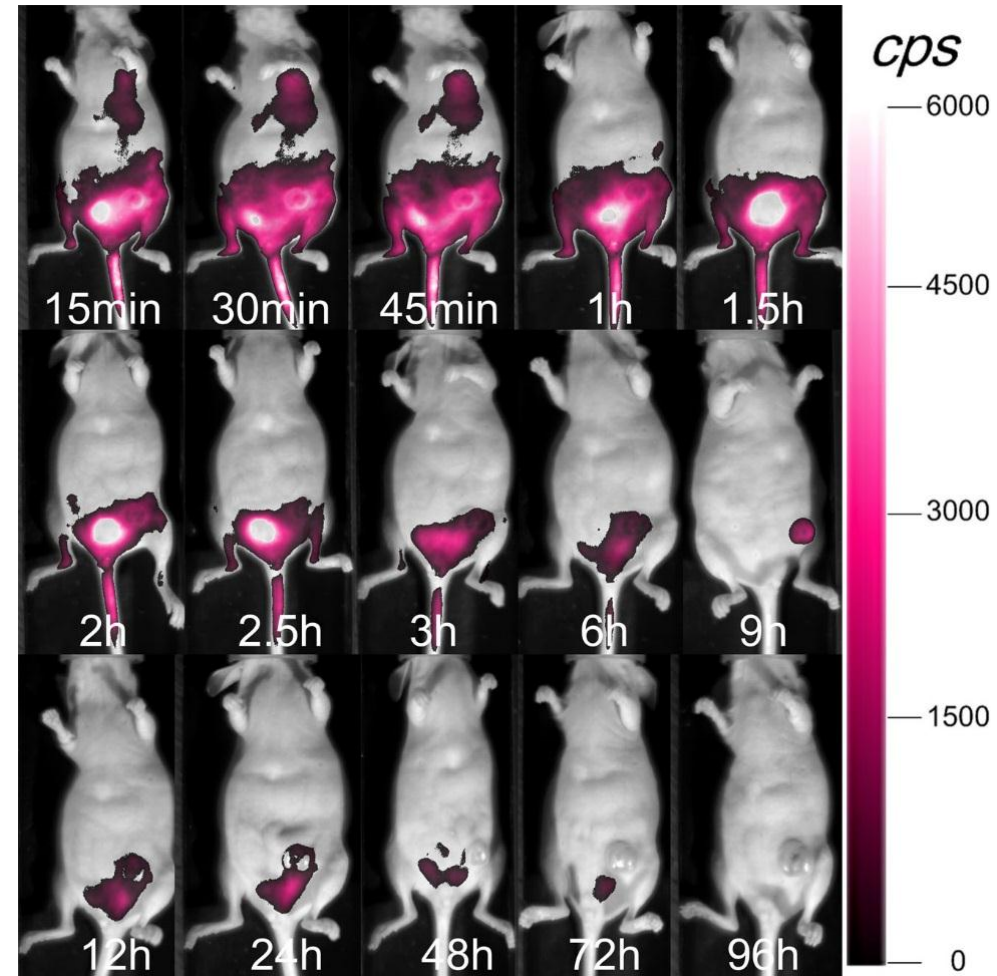

**Figure S3.** Biodistribution of the HER2-645 probe *in vivo* at different time points after IV injection using the Berthold equipment.

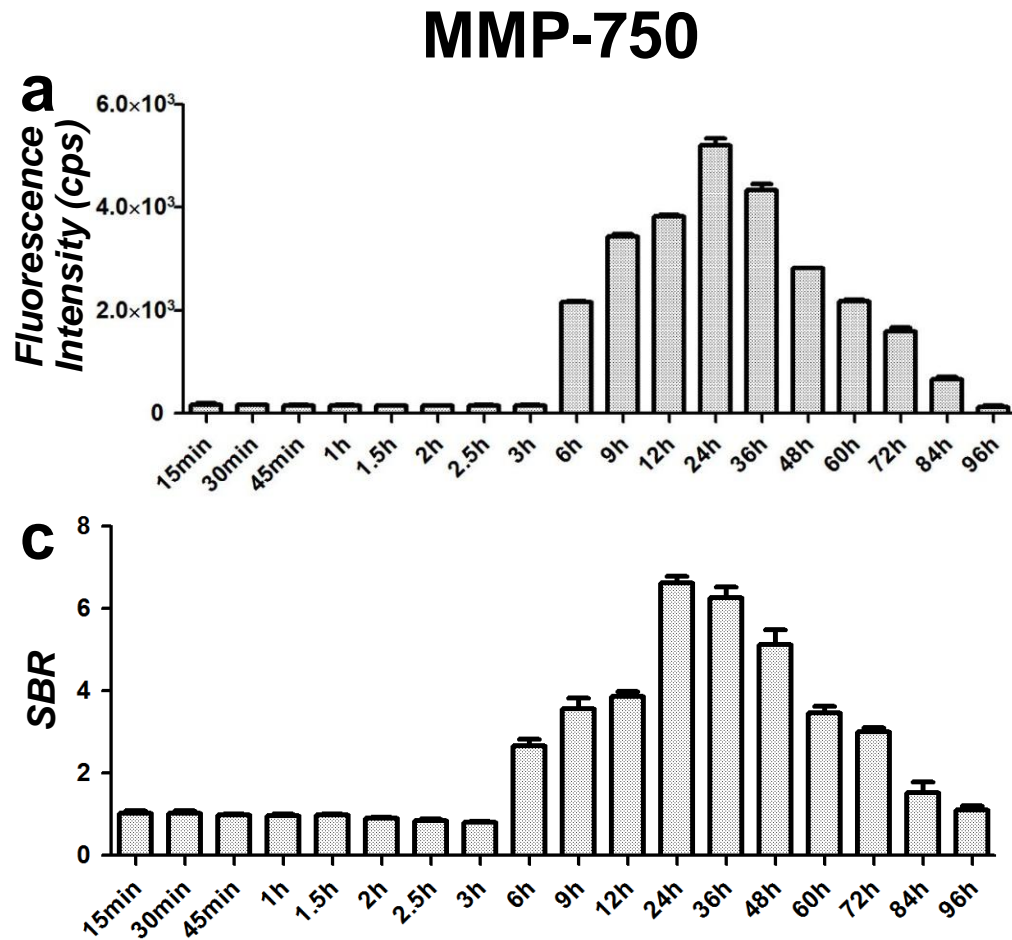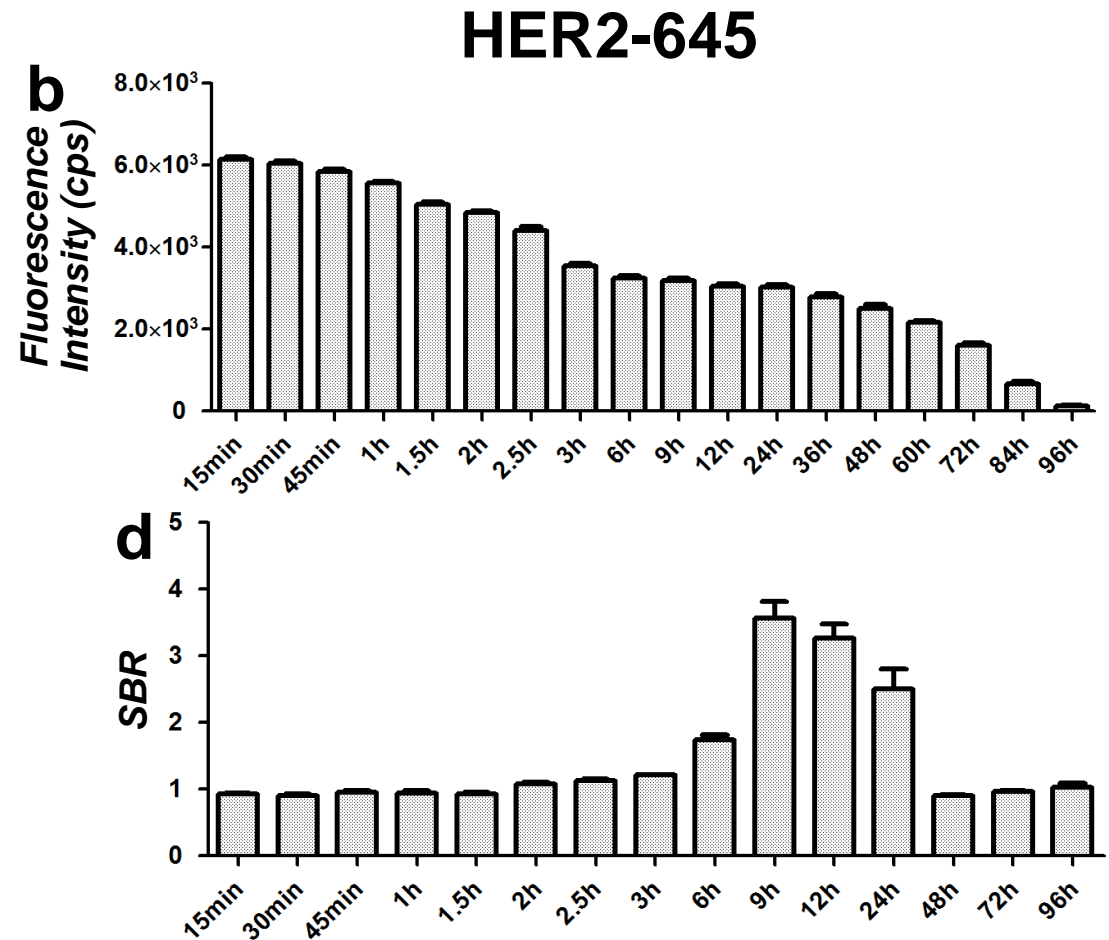

**Figure S4.** Quantification of the in vivo biodistribution of the MMP-750 and HER2-645 probes at different time points. The quantification of fluorescence intensity in tumor areas with MMP-750 probe (a) and HER2-645 probe (b). Signal to background ratio (SBR) analysis of MMP-750 probe (c) and HER2-645 probe (d).

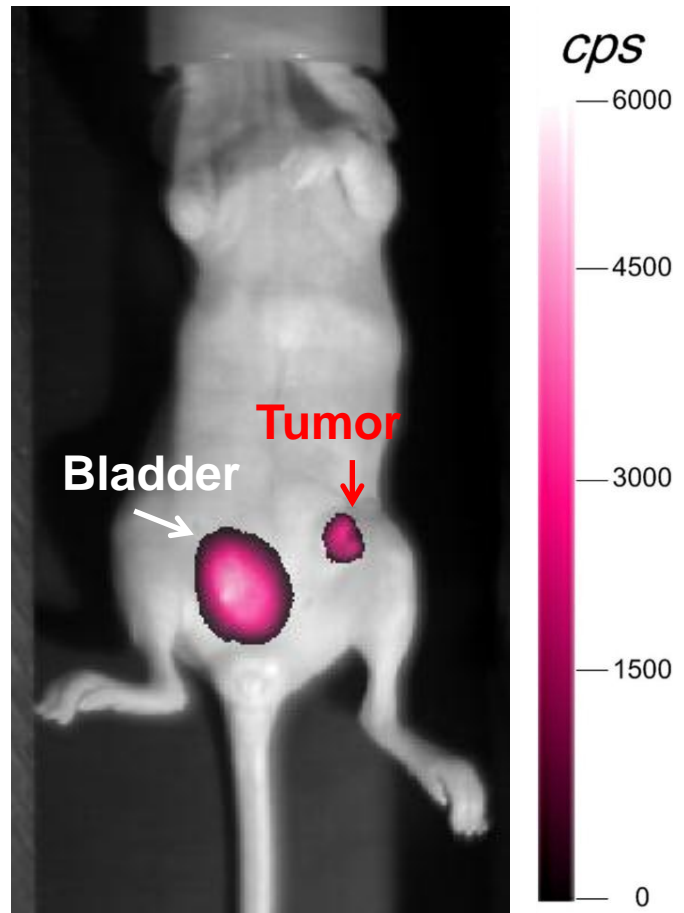

**Figure S5.** Intra-operative FMI-guided BCS results using HER2-645 probe.

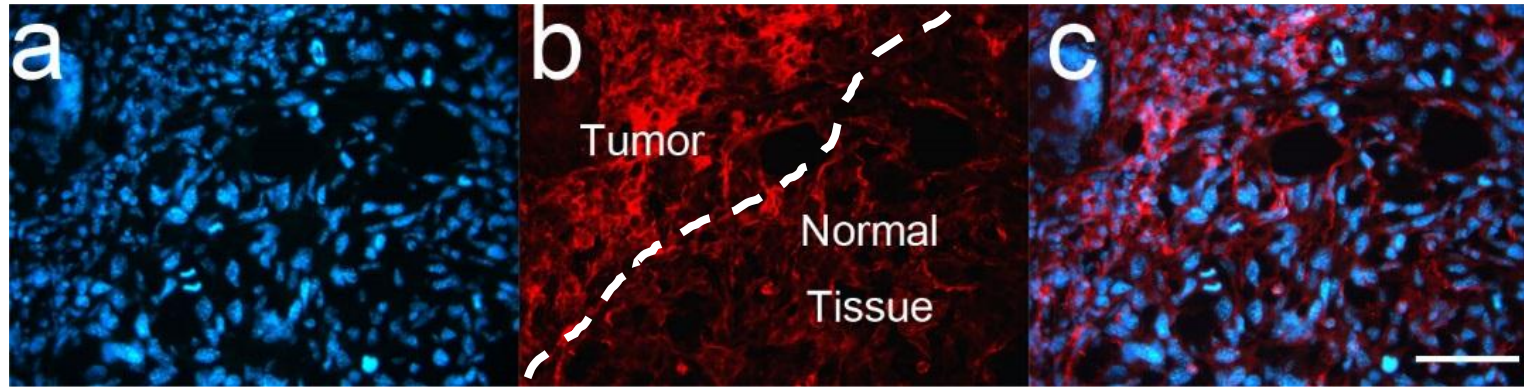

**Figure S6.** HER2 immunofluorescence staining on orthotopic tumor. (a) DAPI, (b) HER2 immunofluorescence, and (c) overlay. scale bar = 50  $\mu\text{m}$ .
